# Supplementary material
Source: Research Square preprint supplement (doi:10.21203/rs.3.rs-9153719/v1)
Supplement: Supplementary file 1 [file 4ef7ae930edf7f91c0af4840.xlsx]

## Sheet: Fig. S1
			Fig. S1. Strucutral polyprotein based phylogenetic analysis of 85 RRV isolates in Australia.

## Sheet: Fig. 2
	Fig. 2a			Fig. 2b										Fig. 2c				Fig. 2d					Fig. 2e
	Year	RRV			ACT	NSW	NT	QLD	SA	TAS	VIC	WA		Country	State	Cases		Host	Sample type/species	No of samples	Total		Location	Number of isolates
	2025	1774		1991	0	0	0	0	0	0	0	0		#VALUE!	#VALUE!	242		Human	Blood	15	15		Queensland	21
	2024	3375		1992	0	0	0	0	0	0	0	0		#VALUE!	#VALUE!	26018		Mosquitos	Culicidae	6	66		Northern Territory	10
	2023	1711		1993	4	598	264	2251	773	10	1216	153		#VALUE!	#VALUE!	6769			Aedes notoscriptus	3			New South Wales	37
	2022	2906		1994	1	331	312	2998	28	24	57	94		#VALUE!	#VALUE!	69235			Ochlerotatus vigilax	14			Tasmania	4
	2021	3096		1995	2	236	369	1642	21	28	32	298		#VALUE!	#VALUE!	6844			Ochlerotatus normanensis	3			Victoria	5
	2020	6367		1996	1	1030	137	4880	56	76	148	1437		#VALUE!	#VALUE!	754			Ochlerotatus procax	4			Others (Australia)	9
	2019	2965		1997	9	1599	218	2361	635	11	1044	735		#VALUE!	#VALUE!	11610			Ochlerotatus theobaldi	1			Total	86
	2018	3103		1998	6	579	127	1946	67	9	135	298		#VALUE!	#VALUE!	21589			Ochlerotatus sagax	1
	2017	6933		1999	8	951	157	2303	40	66	223	700							Ochlerotatus camptorhynchus	7
	2016	3736		2000	16	747	145	1481	417	8	321	987							Ochlerotatus eidsvoldensis	1
	2015	9532		2001	9	717	225	1567	142	13	349	153							Culex annulirostris	21
	2014	5309		2002	0	182	63	885	42	117	37	154							Culex quinquefasciatus	1
	2013	4311		2003	1	492	120	2513	33	4	15	828							Culex australicus	1
	2012	4675		2004	6	698	233	2005	53	20	90	914							Anopheles annulipes	2
	2011	5127		2005	4	579	210	1179	155	5	97	316							Coquillettidia linealis	1
	2010	5120		2006	11	1219	278	2608	316	14	211	794						Birds	Microeca fascinans	1	3
	2009	4736		2007	13	839	299	2136	211	8	95	545							Poephila personata	1
	2008	5607		2008	21	1150	263	2843	195	77	233	825							Grallina cyanoleuca	1
	2007	4146		2009	4	906	431	2142	330	29	94	800						Animal	Agile wallaby	2	2
	2006	5451		2010	22	1086	336	2380	452	37	419	388						Toal			86
	2005	2545		2011	8	581	184	1216	980	7	1302	849
	2004	4019		2012	11	603	226	1943	221	18	278	1375
	2003	4006		2013	4	503	301	1792	170	8	168	1365
	2002	1480		2014	5	673	412	2344	75	18	212	1570
	2001	3175		2015	10	1608	360	6192	112	5	292	953
	2000	4122		2016	21	699	201	1628	159	8	542	478
	1999	4448		2017	13	1557	166	1849	457	49	1685	1157
	1998	3167		2018	6	576	123	1701	56	12	136	493
	1997	6612		2019	5	594	155	1624	45	14	144	384
	1996	7765		2020	3	1995	96	3383	87	5	277	521
	1995	2628		2021	6	657	95	814	83	24	719	698
	1994	3845		2022	5	730	74	835	215	10	593	444
	1993	5269		2023	2	357	66	695	95	3	177	316
	1992	0		2024	4	482	63	2479	24	12	99	212
	1991	0		2025	1	464	60	620	99	5	170	355
				Total	242	26018	6769	69235	6844	754	11610	21589

## Sheet: Table S1
Table S1. Amino acid substitution number and position of 85 RRV isolates along with their host name and collection date
	Accession Number	Host	Year	Number of mutation	Mutation position
	WAB51738.1	Ochlerotatus normanensis	1984	4	Y5H, I54L, D119N, R238K,
	WAB51740.1	Culex annulirostris	1984	4	Y5H, I54L, D119N, R238K,
	WAB51732.1	Ochlerotatus vigilax	1983	4	Y5H, I54L, D119N, R238K,
	WAB51736.1	Ochlerotatus normanensis	1984	4	Y5H, I54L, D119N, R238K,
	WAB51794.1	Ochlerotatus sagax	1990	4	Y5H, I54L, D119N, R238K,
	WAB51808.1	Ochlerotatus procax	1990	4	Y5H, I54L, D119N, R238K,
	WAB51760.1	Ochlerotatus vigilax	1991	4	Y5H, I54L, D119N, R238K
	WAB51812.1	Ochlerotatus camptorhynchus	2002	4	Y5H, I54L, D119N, R238K,
	WAB51816.1	Ochlerotatus camptorhynchus	2002	4	Y5H, I54L, D119N, R238K
	WAB51810.1	Ochlerotatus camptorhynchus	1991	4	Y5H, I54L, D119N, R238K,
	WAB51726.1	Homo sapiens	1994	5	Y5H, I54L, V89A, D119N, R238K
	WAB51754.1	Ochlerotatus procax	1992	4	Y5H, I54L, D119N, R238K
	WAB51762.1	Culex annulirostris	1994	5	Y5H, I54L, D119N, R238K, R303H
	WAB51722.1	Homo sapiens	1991	4	Y5H, I54L, D119N, R238K
	AYI50350.1	Homo sapiens	1972	2	Y5H, I54L,
	ACV67000.1	Notamacropus agilis	1968	2	Y5H, I54L
	ACV66998.1	Notamacropus agilis	1965	3	Y5H, I54L, V93A
	WAB51784.1	Culex annulirostris	1992	3	Y5H, I54L, R238K,
	WAB51820.1	Ochlerotatus eidsvoldensis	2002	3	Y5H, I54L, R238K
	WAB51780.1	Culex annulirostris	1996	3	Y5H, I54L, R238K,
	WAB51792.1	Culex annulirostris	1995	3	Y5H, I54L, R238K,
	WAB51766.1	Culex annulirostris	1992	3	Y5H, I54L, R238K
	WAB51756.1	Ochlerotatus vigilax	1992	3	Y5H, I54L, R238K
	WAB51776.1	Culex annulirostris	1992	4	Y5H, I54L, R238K, S361G
	WAB51790.1	Culex quinquefasciatus	2005	3	Y5H, I54L, R238K,
	WAB51818.1	Coquillettidia linealis	1995	5	Y5H, I54L, K117M, R238K, M363V
	WAB51786.1	Anopheles annulipes	2000	4	Y5H, I54L, D119N, R238K
	WAB51782.1	Ochlerotatus vigilax	1999	4	Y5H, I54L, D119N, R238K,
	WAB51796.1	Ochlerotatus vigilax	2005	4	Y5H, I54L, D119N, R238K
	WAB51824.1	Aedes notoscriptus	1999	4	Y5H, I54L, D119N, R238K,
	WAB51764.1	Culex annulirostris	2000	4	Y5H, I54L, D119N, R238K
	WAB51798.1	Culex australicus	2011	5	Y5H, I54L, D119N, R238K, P306S
	WAB51774.1	Culex annulirostris	1998	4	Y5H, I54L, D119N, R238K
	ACV66992.1	Homo sapiens	2004	4	Y5H, I54L, D119N, R238K
	YP010775805.1	Homo sapiens	2004	4	Y5H, I54L, D119N, R238K
	WAB51720.1	Homo sapiens	1990	4	Y5H, I54L, D119N, R238K
	WAB51714.1	Homo sapiens	1996	4	Y5H, I54L, D119N, R238K
	WAB51822.1	Culex annulirostris	1996	4	Y5H, I54L, D119N, R238K
	WAB51706.1	Culicidae	1997	4	Y5H, I54L, D119N, R238K,
	WAB51710.1	Culicidae	1988	4	Y5H, I54L, D119N, R238K,
	WAB51772.1	Culex annulirostris	2000	4	Y5H, I54L, D119N, R238K
	WAB51788.1	Culex annulirostris	1997	4	Y5H, I54L, D119N, R238K,
	WAB51708.1	Culicidae	1996	4	Y5H, I54L, D119N, R238K
	WAB51768.1	Culex annulirostris	1997	4	Y5H, I54L, D119N, R238K
	WAB51758.1	Ochlerotatus vigilax	1997	4	Y5H, I54L, D119N, R238K
	WAB51834.1	Ochlerotatus vigilax	2005	4	Y5H, I54L, D119N, R238K
	WAB51770.1	Ochlerotatus theobaldi	2000	4	Y5H, I54L, D119N, R238K
	WAB51802.1	Ochlerotatus vigilax	1996	4	Y5H, I54L, D119N, R238K,
	WAB51804.1	Ochlerotatus vigilax	2006	4	Y5H, I54L, D119N, R238K,
	UQB70643.1	Ochlerotatus camptorhynchus	2013	4	Y5H, I54L, D119N, R238K
	WAB51716.1	Homo sapiens	2015	7	Y5H, I54L, D119N, R238K, A356T, M363I, T371A
	AZF99252.1	Homo sapiens	2016	7	Y5H, I54L, D119N, R238K, A356T, M363I, T371A
	WAB51724.1	Culicidae	2007	5	Y5H, I54L, D193G, D119N, R238K,
	WAB51828.1	Ochlerotatus procax	2015	5	Y5H, M32K, I54L, R238K, L273F
	WAB51830.1	Ochlerotatus procax	2015	5	Y5H, M32K, I54L, R238K, L273F
	WAB51752.1	Culex annulirostris	2006	5	Y5H, I54L, D119N, R238K, T371I
	WAB51778.1	Culex annulirostris	2005	5	Y5H, I54L, D119N, R238K, T371I
	WAB51800.1	Ochlerotatus vigilax	2006	5	Y5H, I54L, D119N, S169L, R238K,
	WAB51750.1	Culex annulirostris	1990	4	Y5H, I54L, D119N, R238K
	WAB51814.1	Aedes notoscriptus	2014	5	Y5H, I54L, A76S, R238K, V262A
	QQY97226.1	Homo sapiens	1971	0	-
	ACV66996.1	Poephila personata	1965	0	-
	ACV66994.1	Microeca fascinans	1965	0	-
	AYI50356.1	Ochlerotatus vigilax	1959	-	Ref
	ACV67002.1	Ochlerotatus vigilax	1959	1	Y5*
	WAB51712.1	Homo sapiens	2016	4	Y5H, I54L, R238K, A376T
	AQZ26873.1	Homo sapiens	2014	3	Y5H, I54L, R238K
	AYI50344.1	Homo sapiens	2009	4	Y5H, I54L, R238K, A376T
	WAB51718.1	Homo sapiens	2015	4	Y5H, I54L, R238K, A376T
	WAB51832.1	Anopheles annulipes	2015	4	Y5H, I54L, R238K, L273F
	UQB70645.1	Culex annulirostris	2016	4	Y5H, I54L, R238K, A376T
	UQW95926.1	Ochlerotatus camptorhynchus	2017	4	Y5H, I54L, R238K, L273F,
	WAB51728.1	Culicidae	2018	6	Y5H, I54L, R238K, Y283H, E309V, A376T
	WAB51730.1	Aedes notoscriptus	2018	6	Y5H, I54L, R238K, Y283H, E309V, A376T
	AZF99256.1	Culicidae	2018	5	Y5H, I54L, R238K, Y283H, A376T
	AZF99254.1	Homo sapiens	2017	5	Y5H, I54L, R238K, Y283H, A376T
	UQW95924.1	Ochlerotatus camptorhynchus	2017	5	Y5H, I54L, K117R, R238K, L273F
	UQW95928.1	Ochlerotatus camptorhynchus	2017	5	Y5H, I54L, R238K, Q315R, A376T
	WAB51826.1	Culex annulirostris	2015	4	Y5H, I54L, D119N, R238K
	WAB51742.1	Ochlerotatus vigilax	1986	4	Y5H, I5ML, R238K, E289V
	WAB51744.1	Ochlerotatus vigilax	1986	4	Y5H, I54M, R238K, E289V
	WAB51734.1	Culex annulirostris	1983	4	Y5H, I54M, R238K, E289V
	WAB51746.1	Ochlerotatus normanensis	1987	4	Y5H, I54M, R238K, E289V
	WAB51748.1	Culex annulirostris	1987	7	Y5H, V19I, I54M, A105T, R238K, E289V, H291Q

## Sheet: Table S2
		Table S2. Amino acid composition in E2 protein of 85 RRV isolates
	Isolates	Ala	Cys	Asp	Glu	Phe	Gly	His	Ile	Lys	Leu	Met	Asn	Pro	Gln	Arg	Ser	Thr	Val	Trp	Tyr
	AYI50356.1 E2	8.933	4.218	5.707	4.467	2.481	6.7	4.467	4.715	4.963	7.444	1.489	1.737	7.692	2.978	5.211	4.715	9.181	6.948	1.241	4.715
	YP 010775805.1 E2	8.933	4.218	5.459	4.467	2.481	6.7	4.715	4.467	5.211	7.692	1.489	1.985	7.692	2.978	4.963	4.715	9.181	6.948	1.241	4.467
	WAB51834.1 E2	8.933	4.218	5.459	4.467	2.481	6.7	4.715	4.467	5.211	7.692	1.489	1.985	7.692	2.978	4.963	4.715	9.181	6.948	1.241	4.467
	WAB51832.1 E2	8.933	4.218	5.707	4.467	2.73	6.7	4.715	4.467	5.211	7.444	1.489	1.737	7.692	2.978	4.963	4.715	9.181	6.948	1.241	4.467
	WAB51830.1 E2	8.933	4.218	5.459	4.467	2.481	6.7	4.715	4.467	5.459	7.692	1.241	1.985	7.692	2.978	4.963	4.715	9.181	6.948	1.241	4.467
	WAB51828.1 E2	8.933	4.218	5.459	4.467	2.481	6.7	4.715	4.467	5.459	7.692	1.241	1.985	7.692	2.978	4.963	4.715	9.181	6.948	1.241	4.467
	WAB51826.1 E2	8.933	4.218	5.459	4.467	2.481	6.7	4.715	4.467	5.211	7.692	1.489	1.985	7.692	2.978	4.963	4.715	9.181	6.948	1.241	4.467
	WAB51824.1 E2	8.933	4.218	5.459	4.467	2.481	6.7	4.715	4.467	5.211	7.692	1.489	1.985	7.692	2.978	4.963	4.715	9.181	6.948	1.241	4.467
	WAB51822.1 E2	8.933	4.218	5.459	4.467	2.481	6.7	4.715	4.467	5.211	7.692	1.489	1.985	7.692	2.978	4.963	4.715	9.181	6.948	1.241	4.467
	WAB51820.1 E2	8.933	4.218	5.707	4.467	2.481	6.7	4.715	4.467	5.211	7.692	1.489	1.737	7.692	2.978	4.963	4.715	9.181	6.948	1.241	4.467
	WAB51818.1 E2	8.933	4.218	5.707	4.467	2.481	6.7	4.715	4.467	4.963	7.692	1.489	1.737	7.692	2.978	4.963	4.715	9.181	7.196	1.241	4.467
	WAB51816.1 E2	8.933	4.218	5.459	4.467	2.481	6.7	4.715	4.467	5.211	7.692	1.489	1.985	7.692	2.978	4.963	4.715	9.181	6.948	1.241	4.467
	WAB51814.1 E2	8.933	4.218	5.459	4.467	2.481	6.7	4.715	4.467	5.211	7.692	1.489	1.985	7.692	2.978	4.963	4.963	9.181	6.7	1.241	4.467
	WAB51812.1 E2	8.933	4.218	5.459	4.467	2.481	6.7	4.715	4.467	5.211	7.692	1.489	1.985	7.692	2.978	4.963	4.715	9.181	6.948	1.241	4.467
	WAB51810.1 E2	8.933	4.218	5.459	4.467	2.481	6.7	4.715	4.467	5.211	7.692	1.489	1.985	7.692	2.978	4.963	4.715	9.181	6.948	1.241	4.467
	WAB51808.1 E2	8.933	4.218	5.459	4.467	2.481	6.7	4.715	4.467	5.211	7.692	1.489	1.985	7.692	2.978	4.963	4.715	9.181	6.948	1.241	4.467
	WAB51804.1 E2	8.933	4.218	5.459	4.467	2.481	6.7	4.715	4.467	5.211	7.692	1.489	1.985	7.692	2.978	4.963	4.715	9.181	6.948	1.241	4.467
	WAB51802.1 E2	8.933	4.218	5.459	4.467	2.481	6.7	4.715	4.467	5.211	7.692	1.489	1.985	7.692	2.978	4.963	4.715	9.181	6.948	1.241	4.467
	WAB51800.1 E2	8.933	4.218	5.459	4.467	2.481	6.7	4.715	4.467	5.211	7.94	1.489	1.985	7.692	2.978	4.963	4.467	9.181	6.948	1.241	4.467
	WAB51798.1 E2	8.933	4.218	5.459	4.467	2.481	6.7	4.715	4.467	5.211	7.692	1.489	1.985	7.444	2.978	4.963	4.963	9.181	6.948	1.241	4.467
	WAB51796.1 E2	8.933	4.218	5.459	4.467	2.481	6.7	4.715	4.467	5.211	7.692	1.489	1.985	7.692	2.978	4.963	4.715	9.181	6.948	1.241	4.467
	WAB51794.1 E2	8.933	4.218	5.459	4.467	2.481	6.7	4.715	4.467	5.211	7.692	1.489	1.985	7.692	2.978	4.963	4.715	9.181	6.948	1.241	4.467
	WAB51792.1 E2	8.933	4.218	5.707	4.467	2.481	6.7	4.715	4.467	5.211	7.692	1.489	1.737	7.692	2.978	4.963	4.715	9.181	6.948	1.241	4.467
	WAB51790.1 E2	8.933	4.218	5.707	4.467	2.481	6.7	4.715	4.467	5.211	7.692	1.489	1.737	7.692	2.978	4.963	4.715	9.181	6.948	1.241	4.467
	WAB51788.1 E2	8.933	4.218	5.459	4.467	2.481	6.7	4.715	4.467	5.211	7.692	1.489	1.985	7.692	2.978	4.963	4.715	9.181	6.948	1.241	4.467
	WAB51786.1 E2	8.933	4.218	5.459	4.467	2.481	6.7	4.715	4.467	5.211	7.692	1.489	1.985	7.692	2.978	4.963	4.715	9.181	6.948	1.241	4.467
	WAB51784.1 E2	8.933	4.218	5.707	4.467	2.481	6.7	4.715	4.467	5.211	7.692	1.489	1.737	7.692	2.978	4.963	4.715	9.181	6.948	1.241	4.467
	WAB51782.1 E2	8.933	4.218	5.459	4.467	2.481	6.7	4.715	4.467	5.211	7.692	1.489	1.985	7.692	2.978	4.963	4.715	9.181	6.948	1.241	4.467
	WAB51780.1 E2	8.933	4.218	5.707	4.467	2.481	6.7	4.715	4.467	5.211	7.692	1.489	1.737	7.692	2.978	4.963	4.715	9.181	6.948	1.241	4.467
	WAB51778.1 E2	8.933	4.218	5.459	4.467	2.481	6.7	4.715	4.715	5.211	7.692	1.489	1.985	7.692	2.978	4.963	4.715	8.933	6.948	1.241	4.467
	WAB51776.1 E2	8.933	4.218	5.707	4.467	2.481	6.948	4.715	4.467	5.211	7.692	1.489	1.737	7.692	2.978	4.963	4.467	9.181	6.948	1.241	4.467
	WAB51774.1 E2	8.933	4.218	5.459	4.467	2.481	6.7	4.715	4.467	5.211	7.692	1.489	1.985	7.692	2.978	4.963	4.715	9.181	6.948	1.241	4.467
	WAB51772.1 E2	8.933	4.218	5.459	4.467	2.481	6.7	4.715	4.467	5.211	7.692	1.489	1.985	7.692	2.978	4.963	4.715	9.181	6.948	1.241	4.467
	WAB51770.1 E2	8.933	4.218	5.459	4.467	2.481	6.7	4.715	4.467	5.211	7.692	1.489	1.985	7.692	2.978	4.963	4.715	9.181	6.948	1.241	4.467
	WAB51768.1 E2	8.933	4.218	5.459	4.467	2.481	6.7	4.715	4.467	5.211	7.692	1.489	1.985	7.692	2.978	4.963	4.715	9.181	6.948	1.241	4.467
	WAB51766.1 E2	8.933	4.218	5.707	4.467	2.481	6.7	4.715	4.467	5.211	7.692	1.489	1.737	7.692	2.978	4.963	4.715	9.181	6.948	1.241	4.467
	WAB51764.1 E2	8.933	4.218	5.459	4.467	2.481	6.7	4.715	4.467	5.211	7.692	1.489	1.985	7.692	2.978	4.963	4.715	9.181	6.948	1.241	4.467
	WAB51762.1 E2	8.933	4.218	5.459	4.467	2.481	6.7	4.963	4.467	5.211	7.692	1.489	1.985	7.692	2.978	4.715	4.715	9.181	6.948	1.241	4.467
	WAB51760.1 E2	8.933	4.218	5.459	4.467	2.481	6.7	4.715	4.467	5.211	7.692	1.489	1.985	7.692	2.978	4.963	4.715	9.181	6.948	1.241	4.467
	WAB51758.1 E2	8.933	4.218	5.459	4.467	2.481	6.7	4.715	4.467	5.211	7.692	1.489	1.985	7.692	2.978	4.963	4.715	9.181	6.948	1.241	4.467
	WAB51756.1 E2	8.933	4.218	5.707	4.467	2.481	6.7	4.715	4.467	5.211	7.692	1.489	1.737	7.692	2.978	4.963	4.715	9.181	6.948	1.241	4.467
	WAB51754.1 E2	8.933	4.218	5.459	4.467	2.481	6.7	4.715	4.467	5.211	7.692	1.489	1.985	7.692	2.978	4.963	4.715	9.181	6.948	1.241	4.467
	WAB51752.1 E2	9.181	4.218	5.459	4.467	2.481	6.7	4.715	4.467	5.211	7.692	1.489	1.985	7.692	2.978	4.963	4.715	8.933	6.948	1.241	4.467
	WAB51750.1 E2	8.933	4.218	5.459	4.467	2.481	6.7	4.715	4.467	5.211	7.692	1.489	1.985	7.692	2.978	4.963	4.715	9.181	6.948	1.241	4.467
	WAB51748.1 E2	8.685	4.218	5.707	4.218	2.481	6.7	4.467	4.715	5.211	7.444	1.737	1.737	7.692	3.226	4.963	4.715	9.429	6.948	1.241	4.467
	WAB51746.1 E2	8.933	4.218	5.707	4.218	2.481	6.7	4.715	4.467	5.211	7.444	1.737	1.737	7.692	2.978	4.963	4.715	9.181	7.196	1.241	4.467
	WAB51744.1 E2	8.933	4.218	5.707	4.218	2.481	6.7	4.715	4.467	5.211	7.444	1.737	1.737	7.692	2.978	4.963	4.715	9.181	7.196	1.241	4.467
	WAB51742.1 E2	8.933	4.218	5.707	4.218	2.481	6.7	4.715	4.467	5.211	7.444	1.737	1.737	7.692	2.978	4.963	4.715	9.181	7.196	1.241	4.467
	WAB51740.1 E2	8.933	4.218	5.459	4.467	2.481	6.7	4.715	4.467	5.211	7.692	1.489	1.985	7.692	2.978	4.963	4.715	9.181	6.948	1.241	4.467
	WAB51738.1 E2	8.933	4.218	5.459	4.467	2.481	6.7	4.715	4.467	5.211	7.692	1.489	1.985	7.692	2.978	4.963	4.715	9.181	6.948	1.241	4.467
	WAB51736.1 E2	8.933	4.218	5.459	4.467	2.481	6.7	4.715	4.467	5.211	7.692	1.489	1.985	7.692	2.978	4.963	4.715	9.181	6.948	1.241	4.467
	WAB51734.1 E2	8.933	4.218	5.707	4.218	2.481	6.7	4.715	4.467	5.211	7.444	1.737	1.737	7.692	2.978	4.963	4.715	9.181	7.196	1.241	4.467
	WAB51732.1 E2	8.933	4.218	5.459	4.467	2.481	6.7	4.715	4.467	5.211	7.692	1.489	1.985	7.692	2.978	4.963	4.715	9.181	6.948	1.241	4.467
	WAB51730.1 E2	8.685	4.218	5.707	4.218	2.481	6.948	4.963	4.467	5.211	7.692	1.489	1.737	7.692	2.978	4.963	4.715	9.429	6.948	1.241	4.218
	WAB51728.1 E2	8.685	4.218	5.707	4.218	2.481	6.948	4.963	4.467	5.211	7.692	1.489	1.737	7.692	2.978	4.963	4.715	9.429	6.948	1.241	4.218
	WAB51726.1 E2	9.181	4.218	5.459	4.467	2.481	6.7	4.715	4.467	5.211	7.692	1.489	1.985	7.692	2.978	4.963	4.715	9.181	6.7	1.241	4.467
	WAB51724.1 E2	8.933	4.218	5.211	4.467	2.481	6.948	4.715	4.467	5.211	7.692	1.489	1.985	7.692	2.978	4.963	4.715	9.181	6.948	1.241	4.467
	WAB51722.1 E2	8.933	4.218	5.459	4.467	2.481	6.7	4.715	4.467	5.211	7.692	1.489	1.985	7.692	2.978	4.963	4.715	9.181	6.948	1.241	4.467
	WAB51720.1 E2	8.933	4.218	5.459	4.467	2.481	6.7	4.715	4.467	5.211	7.692	1.489	1.985	7.692	2.978	4.963	4.715	9.181	6.948	1.241	4.467
	WAB51718.1 E2	8.685	4.218	5.707	4.467	2.481	6.7	4.715	4.467	5.211	7.692	1.489	1.737	7.692	2.978	4.963	4.715	9.429	6.948	1.241	4.467
	WAB51716.1 E2	8.933	4.218	5.459	4.467	2.481	6.7	4.715	4.715	5.211	7.692	1.241	1.985	7.692	2.978	4.963	4.715	9.181	6.948	1.241	4.467
	WAB51714.1 E2	8.933	4.218	5.459	4.467	2.481	6.7	4.715	4.467	5.211	7.692	1.489	1.985	7.692	2.978	4.963	4.715	9.181	6.948	1.241	4.467
	WAB51712.1 E2	8.685	4.218	5.707	4.467	2.481	6.7	4.715	4.467	5.211	7.692	1.489	1.737	7.692	2.978	4.963	4.715	9.429	6.948	1.241	4.467
	WAB51710.1 E2	8.933	4.218	5.459	4.467	2.481	6.7	4.715	4.467	5.211	7.692	1.489	1.985	7.692	2.978	4.963	4.715	9.181	6.948	1.241	4.467
	WAB51708.1 E2	8.933	4.218	5.459	4.467	2.481	6.7	4.715	4.467	5.211	7.692	1.489	1.985	7.692	2.978	4.963	4.715	9.181	6.948	1.241	4.467
	WAB51706.1 E2	8.933	4.218	5.459	4.467	2.481	6.7	4.715	4.467	5.211	7.692	1.489	1.985	7.692	2.978	4.963	4.715	9.181	6.948	1.241	4.467
	UQW95928.1 E2	8.685	4.218	5.707	4.467	2.481	6.7	4.715	4.467	5.211	7.692	1.489	1.737	7.692	2.73	5.211	4.715	9.429	6.948	1.241	4.467
	UQW95926.1 E2	8.933	4.218	5.707	4.467	2.73	6.7	4.715	4.467	5.211	7.444	1.489	1.737	7.692	2.978	4.963	4.715	9.181	6.948	1.241	4.467
	UQW95924.1 E2	8.933	4.218	5.707	4.467	2.73	6.7	4.715	4.467	4.963	7.444	1.489	1.737	7.692	2.978	5.211	4.715	9.181	6.948	1.241	4.467
	UQB70645.1 E2	8.685	4.218	5.707	4.467	2.481	6.7	4.715	4.467	5.211	7.692	1.489	1.737	7.692	2.978	4.963	4.715	9.429	6.948	1.241	4.467
	UQB70643.1 E2	8.933	4.218	5.459	4.467	2.481	6.7	4.715	4.467	5.211	7.692	1.489	1.985	7.692	2.978	4.963	4.715	9.181	6.948	1.241	4.467
	QQY97226.1 E2	8.933	4.218	5.707	4.467	2.481	6.7	4.467	4.715	4.963	7.444	1.489	1.737	7.692	2.978	5.211	4.715	9.181	6.948	1.241	4.715
	AZF99256.1 E2	8.685	4.218	5.707	4.467	2.481	6.7	4.963	4.467	5.211	7.692	1.489	1.737	7.692	2.978	4.963	4.715	9.429	6.948	1.241	4.218
	AZF99254.1 E2	8.685	4.218	5.707	4.467	2.481	6.7	4.963	4.467	5.211	7.692	1.489	1.737	7.692	2.978	4.963	4.715	9.429	6.948	1.241	4.218
	AZF99252.1 E2	8.933	4.218	5.459	4.467	2.481	6.7	4.715	4.715	5.211	7.692	1.241	1.985	7.692	2.978	4.963	4.715	9.181	6.948	1.241	4.467
	AYI50350.1 E2	8.933	4.218	5.707	4.467	2.481	6.7	4.715	4.467	4.963	7.692	1.489	1.737	7.692	2.978	5.211	4.715	9.181	6.948	1.241	4.467
	AYI50344.1 E2	8.685	4.218	5.707	4.467	2.481	6.7	4.715	4.467	5.211	7.692	1.489	1.737	7.692	2.978	4.963	4.715	9.429	6.948	1.241	4.467
	AQZ26873.1 E2	8.933	4.218	5.707	4.467	2.481	6.7	4.715	4.467	5.211	7.692	1.489	1.737	7.692	2.978	4.963	4.715	9.181	6.948	1.241	4.467
	ACV67004.1 E2	8.955	4.229	5.721	4.478	2.488	6.716	4.478	4.726	4.975	7.463	1.493	1.741	7.711	2.985	5.224	4.726	9.204	6.716	1.244	4.726
	ACV67002.1 E2	8.955	4.229	5.721	4.478	2.488	6.716	4.478	4.726	4.975	7.463	1.493	1.741	7.711	2.985	5.224	4.726	9.204	6.965	1.244	4.478
	ACV67000.1 E2	8.933	4.218	5.707	4.467	2.481	6.7	4.715	4.467	4.963	7.692	1.489	1.737	7.692	2.978	5.211	4.715	9.181	6.948	1.241	4.467
	ACV66998.1 E2	9.181	4.218	5.707	4.467	2.481	6.7	4.715	4.467	4.963	7.692	1.489	1.737	7.692	2.978	5.211	4.715	9.181	6.7	1.241	4.467
	ACV66996.1 E2	8.933	4.218	5.707	4.467	2.481	6.7	4.467	4.715	4.963	7.444	1.489	1.737	7.692	2.978	5.211	4.715	9.181	6.948	1.241	4.715
	ACV66994.1 E2	8.933	4.218	5.707	4.467	2.481	6.7	4.467	4.715	4.963	7.444	1.489	1.737	7.692	2.978	5.211	4.715	9.181	6.948	1.241	4.715
	ACV66992.1 E2	8.933	4.218	5.459	4.467	2.481	6.7	4.715	4.467	5.211	7.692	1.489	1.985	7.692	2.978	4.963	4.715	9.181	6.948	1.241	4.467
	Average	8.91309	4.21826	5.56145	4.44675	2.48995	6.71205	4.70942	4.49644	5.18502	7.65452	1.49201	1.88006	7.68953	2.97816	4.99248	4.71526	9.20488	6.95131	1.24107	4.47013

## Sheet: Table S3
	Table S3. In siliso prediciton of structural and functional impact of recurrent E2 protein mutations
Top reoccuring mutation	I mutant		Mupro		SHIFT		PolyPhen-2		CUPSAT		DynaMut2
	Predicted Score	Remakrs	Predicted Score	Remakrs	Predicted Score	Remakrs	Predicted Score	Remakrs	Predicted Score	Remakrs	Predicted Score	Remakrs
Y5H	-0.98	Decrease	-1.48962	Decrease	0.58	Tolerated	1	probably damaging	-0.57	Unfavourable ( Destabilising)	-0.43	Destabilising
V19I	-1	Decrease	-0.175709	Decrease	1.00.	Tolerated	0.005 (sensitivity: 0.97; specificity: 0.74)	benign	-3.9	Unfavourable ( Destabilising)	-0.16	Destabilising
M32K	-1.78	Decrease	-2.13277	Decrease	0.12	Tolerated	0.376 (sensitivity: 0.90; specificity: 0.89)	benign	-3.3	Favourable (Destabilising)	-1.41	Destabilising
I54M	0.04	Increase Stability	-0.639375	Decrease	0.52	Tolerated	1.000 (sensitivity: 0.00; specificity: 1.00)	probably damaging	-4.6	Favourable (Destabilising)	-1.31	Destabilising
A105T	-0.62	Decrease	-1.33849	Decrease	0.57	Tolerated	0.014 (sensitivity: 0.96; specificity: 0.79)	benign	-1.84	Favourable (Destabilising)	-0.06	Destabilising
K117M	-0.17	Decrease	0.092352699	Increase Stability	0.04	Affect protein function	0.999 (sensitivity: 0.14; specificity: 0.99)	probably damaging	5.01	Stabilising (Unfavourable)	0.19	Stabilising
D119N	0.05	Increase Stability	-0.74897557	Decrease	0.04	Affect protein function	0.102 (sensitivity: 0.93; specificity: 0.85)	benign	-2.09	Favourable (Destabilising)	0.01	Stabilising
R238K	-1.09	Decrease	-1.2305236	Decrease	1	Tolerated	0.000 (sensitivity: 1.00; specificity: 0.00)	benign	1.71	Stabilising (Favourable)	-1.51	Destabilising
L273F	-0.11	Decrease	-1.51446	Decrease	0.15	Tolerated	0.999 (sensitivity: 0.14; specificity: 0.99)	probably damaging	-2.57	Favourable (Destabilising)	-1.3	Destabilising
Y283H	0.00	Increase Stability	-1.58089	Decrease	0.05	Affect protein function	1.000 (sensitivity: 0.00; specificity: 1.00)	probably damaging	0.58	Stabilising (Favourable)	-1.29	Destabilising
E289V	0.57	Increase Stability	-0.307522	Decrease	0.05	Affect protein function	0.455 (sensitivity: 0.89; specificity: 0.90)	possibly damaging	2.89	Stabilising (Favourable)	0.04	Stabilising
H291Q	-0.38	Decrease	0.15850384	Increase Stability	0.6	Tolerated	0.003 (sensitivity: 0.98; specificity: 0.44)	benign	4.05	Stabilising (Unfavourable)	0.71	Stabilising
E309V	0.12	Increase Stability	0.021451	Increase Stability	0.29	Tolerated	0.006 (sensitivity: 0.97; specificity: 0.75)	benign	-1	Unfavourable ( Destabilising)	-0.01	Destabilising
A356T	-1.64	Decrease	-1.56448	Decrease	0.22	Tolerated	0.948 (sensitivity: 0.79; specificity: 0.95)	possibly damaging	-0.3	Unfavourable ( Destabilising)	0.06	Stabilising
M363V	0.46	Increase Stability	0.61412649	Increase Stability	1	Tolerated	0.000 (sensitivity: 1.00; specificity: 0.00)	benign	0.07	Stabilising (Unfavourable)	0.03	Stabilising
M363I	0.4	Increase Stability	0.204451	Increase Stability	0.94	Tolerated	0.000 (sensitivity: 1.00; specificity: 0.00)	benign	0.12	Stabilising (Favourable)	0.14	Stabilising
T371A	-0.48	Decrease	-0.961992	Decrease	0.31	Tolerated	0.000 (sensitivity: 1.00; specificity: 0.00)	benign	1.61	Stabilising (Favourable)	-0.53	Destabilising
A376T	-0.47	Decrease	-0.688563	Decrease	0.29	Tolerated	0.625 (sensitivity: 0.87; specificity: 0.91)	possibly damaging	-0.36	Unfavourable ( Destabilising)	-0.59	Destabilising
